# Supplementary material
Source: Springer Nature journal article supplement (https://www.springermedizin.de/resource/supplementary/12874_2008_284_MOESM2_ESM.pdf/9434152)

D-dimer test

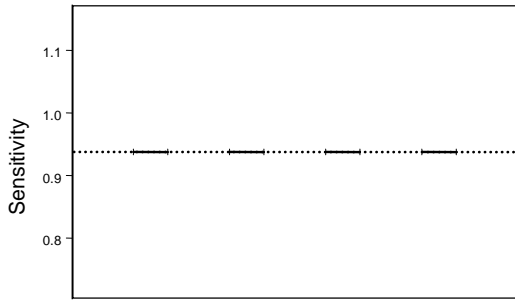

D-dimer test

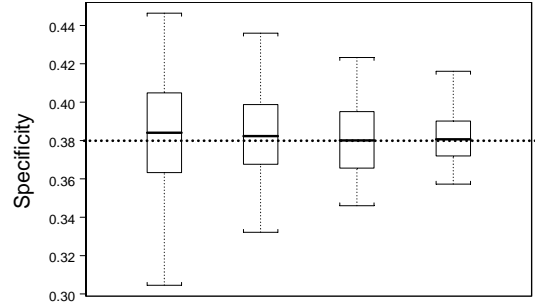

D-dimer test

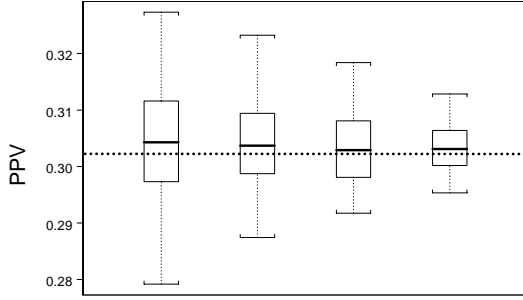

D-dimer test

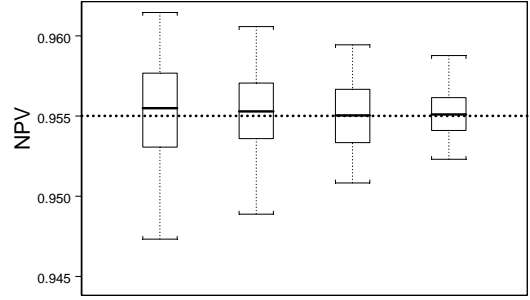

D-dimer test

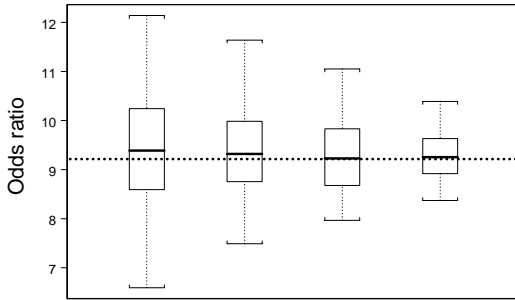

Calf difference test

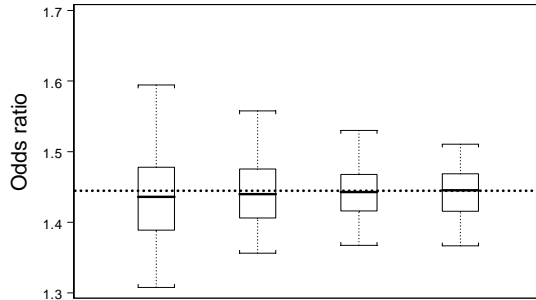

Calf difference test

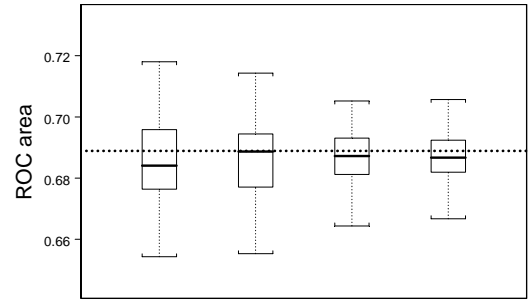

Supplement: MOESM2 [file 9434152]
